# Supplementary material for: Comparison of partially and fully chemically-modified siRNA in conjugate-mediated delivery in vivo
Source: PubMed Central journal article supplement — Nucleic Acids Res. 2018 Feb 8;46(5):2185–96. doi: 10.1093/nar/gky037 (PMC5861422; doi:10.1093/nar/gky037), 2018-02-08
Supplement: gky037_supp.pdf [file gky037_supp.pdf]

# Supplementary Figure 1

A

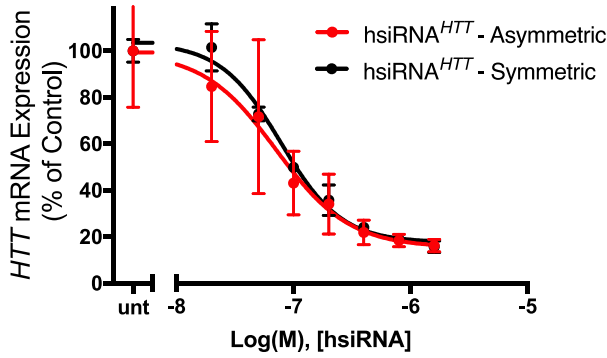

B

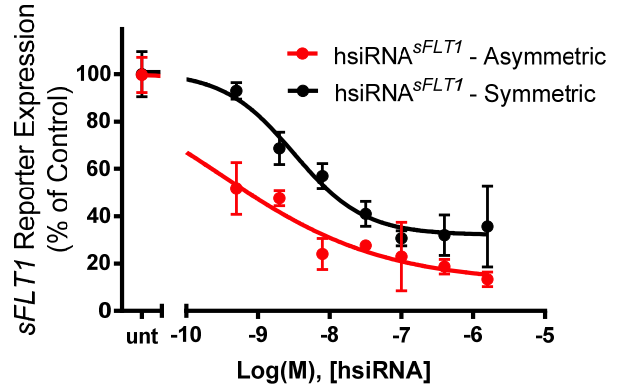

C

| hsiRNA ID                                | hsiRNA Structure | IC <sub>50</sub> (Passive Uptake) | IC <sub>50</sub> (Lipid-mediated Uptake) |
|------------------------------------------|------------------|-----------------------------------|------------------------------------------|
| hsiRNA <sup>HTT</sup>                    |                  | 169 nM                            | 7.5 pM                                   |
| FM.1-hsiRNA <sup>HTT</sup>               |                  | 70 nM                             | 2.3 pM                                   |
| Fluoro tail-hsiRNA <sup>HTT</sup>        |                  | 222 nM                            | 2.9 pM                                   |
| Fluoro AS-hsiRNA <sup>HTT</sup>          |                  | 251 nM                            | 6.4 pM                                   |
| FM-hsiRNA-mismatch <sup>HTT</sup>        |                  | 136 nM                            | 3.4 pM                                   |
| Fluoro AS-hsiRNA-mismatch <sup>HTT</sup> |                  | 279 nM                            | 29 pM                                    |

○ 2'-OH    ● 2'-O-Methyl    ● 2'-F    ⊗ 2'-F Mismatch    ■ Phosphodiester    ■ Phosphorothioate

D

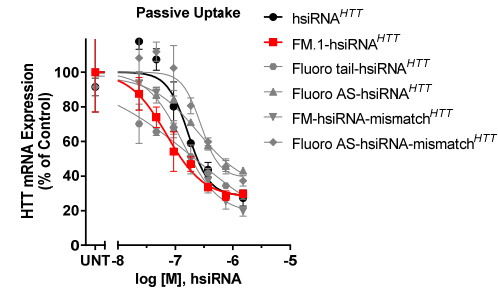

E

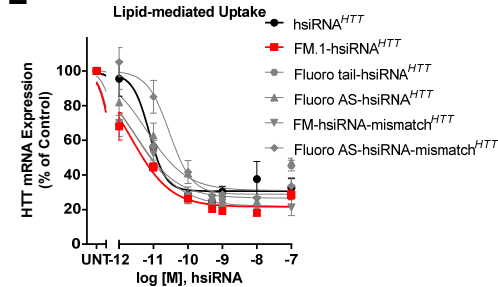

**Supplemental Figure 1. A comparison of symmetric and asymmetric siRNAs *in vitro* and screen of alternative FM-hsiRNA<sup>HTT</sup> patterns.** (A,B) The effect of duplex chemical configuration on siRNA activity is sequence dependent. HeLa cells were treated in the absence of cationic lipids with asymmetric and symmetric siRNAs targeting both *HTT* and *sFLT1*. *HTT* expression was measured using QuantiGene 2.0 (Affymetrix), normalized to the housekeeping gene *HPRT* and *sFLT1* expression was measured using a luciferase reporter assay (C) Representative images of alternative modification patterns and their corresponding IC<sub>50</sub>s. IC<sub>50</sub>s calculated as described in Materials and Methods. Cells treated for 72 hours with compound in the (D) absence (E) or presence of cationic lipids. *HTT* mRNA was measured using QuantiGene 2.0 (Affymetrix), normalized to the housekeeping gene *PPIB*. All data is expressed as percent of untreated control. (n=3 wells, mean ± SD). UNT – untreated cells.

## Supplementary Figure 2

**A**

Primary neurons

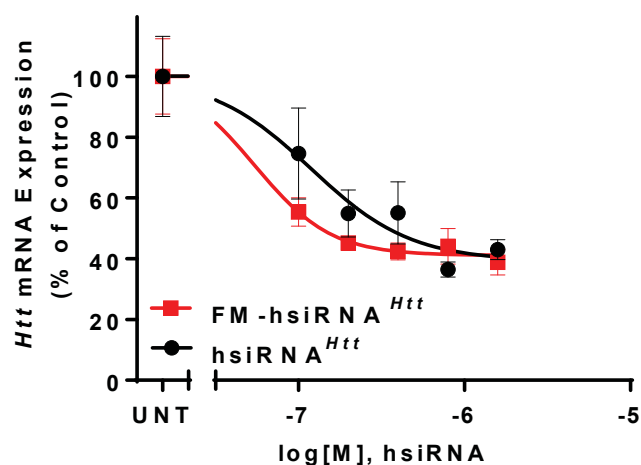

**B**

Primary trophoblasts

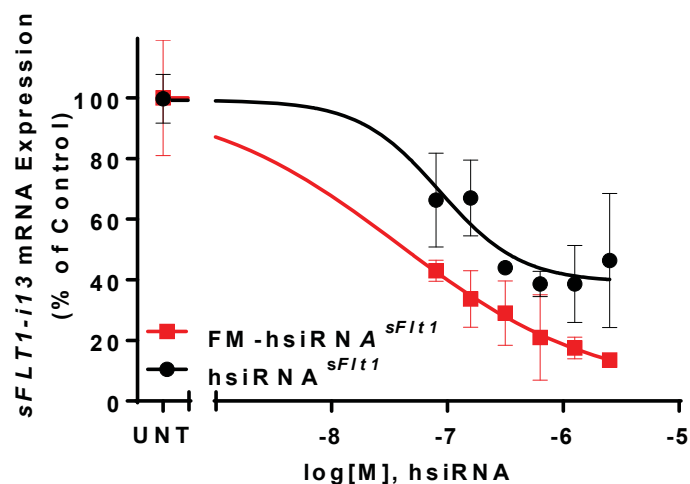

**C**

IC50 (Passive Uptake)

hsiRNA

FM-hsiRNA

Primary neurons  
(targeting *Htt*)

119 nM

54.9 nM

Primary trophoblasts  
(targeting *sFlt1*)

85.7 nM

37.5 nM

**Supplementary Figure 2. Comparison of hsiRNA and FM-hsiRNA activity in vitro.** Primary neurons (A) or primary cytotrophoblasts (B) were incubated with hsiRNA or FM-hsiRNA at concentrations shown for one week. mRNA levels were measured using QuantiGene (Affymetrix) normalized to housekeeping gene (mouse *Ppib* for (A) and human *Ywhaz* for (B)), and presented as percent of untreated control (n=3, mean  $\pm$  SD). UNT – untreated cells. IC50 values were calculated as described in Materials and Methods and are presented in table (C).

# Supplementary Figure 3

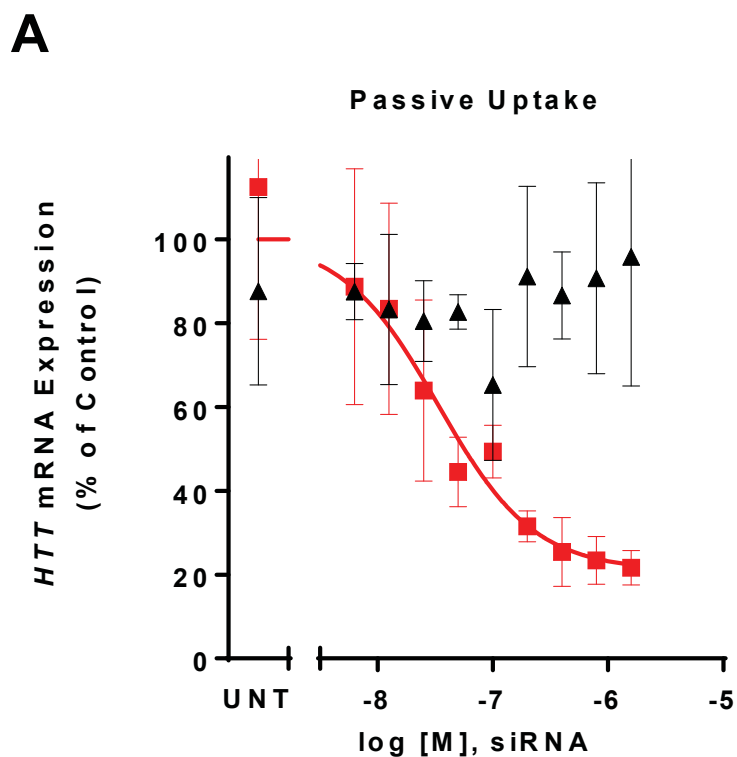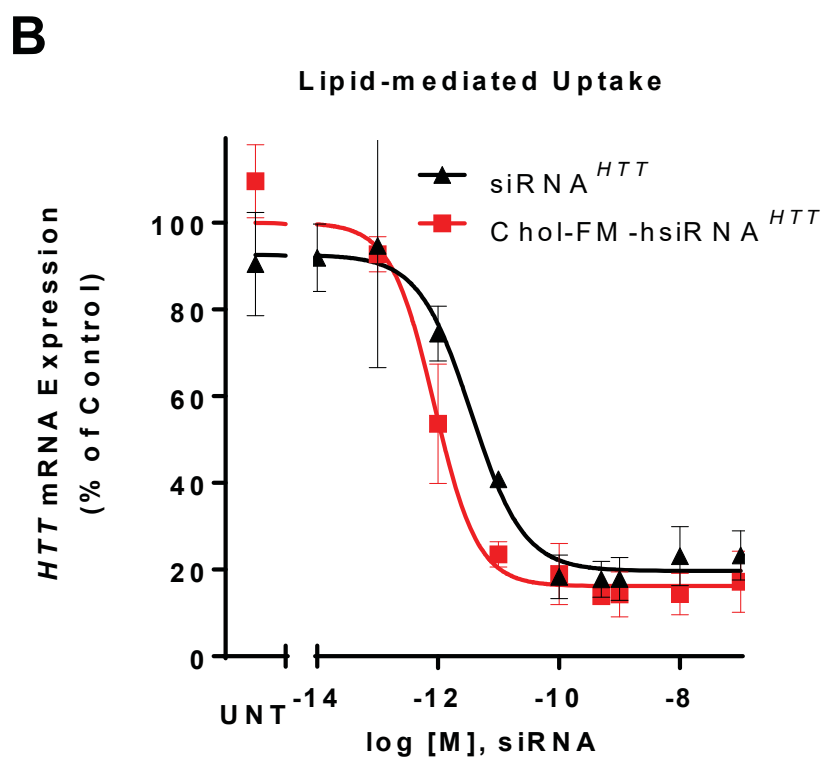

**B**

|                                 | siRNA <sup>HTT</sup> | Chol-FM-hsiRNA <sup>HTT</sup> |
|---------------------------------|----------------------|-------------------------------|
| IC50<br>(Passive Uptake)        | N/A                  | 33.5 nM                       |
| IC50<br>(Lipid Mediated Uptake) | 3.5 pM               | 0.9 pM                        |

**Supplementary Figure 3. Full chemical modification is essential for unassisted cellular delivery and does not compromise siRNA RISC entry.** HeLa Cells treated for 72 hours with compound in the (A) absence or (B) presence of cationic lipids. *HTT* mRNA was measured using QuantiGene®, normalized to the housekeeping gene *PPIB*, and expressed as percent of untreated control. (n=3 wells, mean ± SD). UNT – untreated cells. IC50 values were calculated as described in Materials and Methods and are presented in table (C).

## Supplementary Figure 4

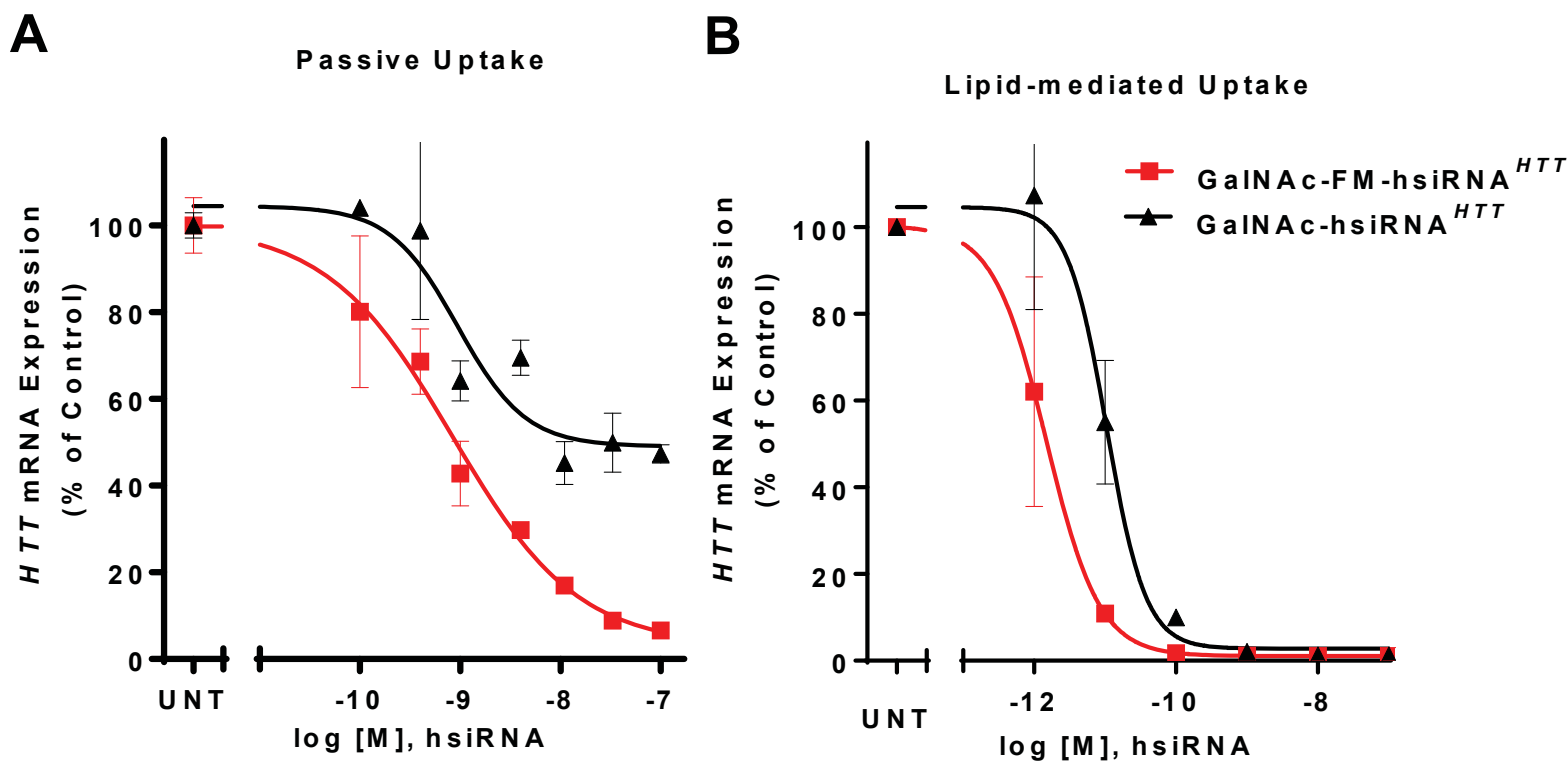

**C**

|                                 | GaINAc-hsiRNA <sup>HTT</sup> | GaINAc-FM-hsiRNA <sup>HTT</sup> |
|---------------------------------|------------------------------|---------------------------------|
| IC50<br>(Passive Uptake)        | 940 pM                       | 830 pM                          |
| IC50<br>(Lipid Mediated Uptake) | 10 pM                        | 1.5 pM                          |

**Supplementary Figure 4 Full chemical modification enhances GalNAc-mediated mRNA silencing in human primary hepatocytes.** Cells treated for 72 hours with compound in the (A) absence or (B) presence of cationic lipids. HTT mRNA was measured using QuantiGene®, normalized to the housekeeping gene PPIB, and expressed as percent of untreated control. (n=3 wells, mean ± SD). UNT – untreated cells. IC50 values were calculated as described in Materials and Methods and are presented in table (C).

# Supplementary Figure 5

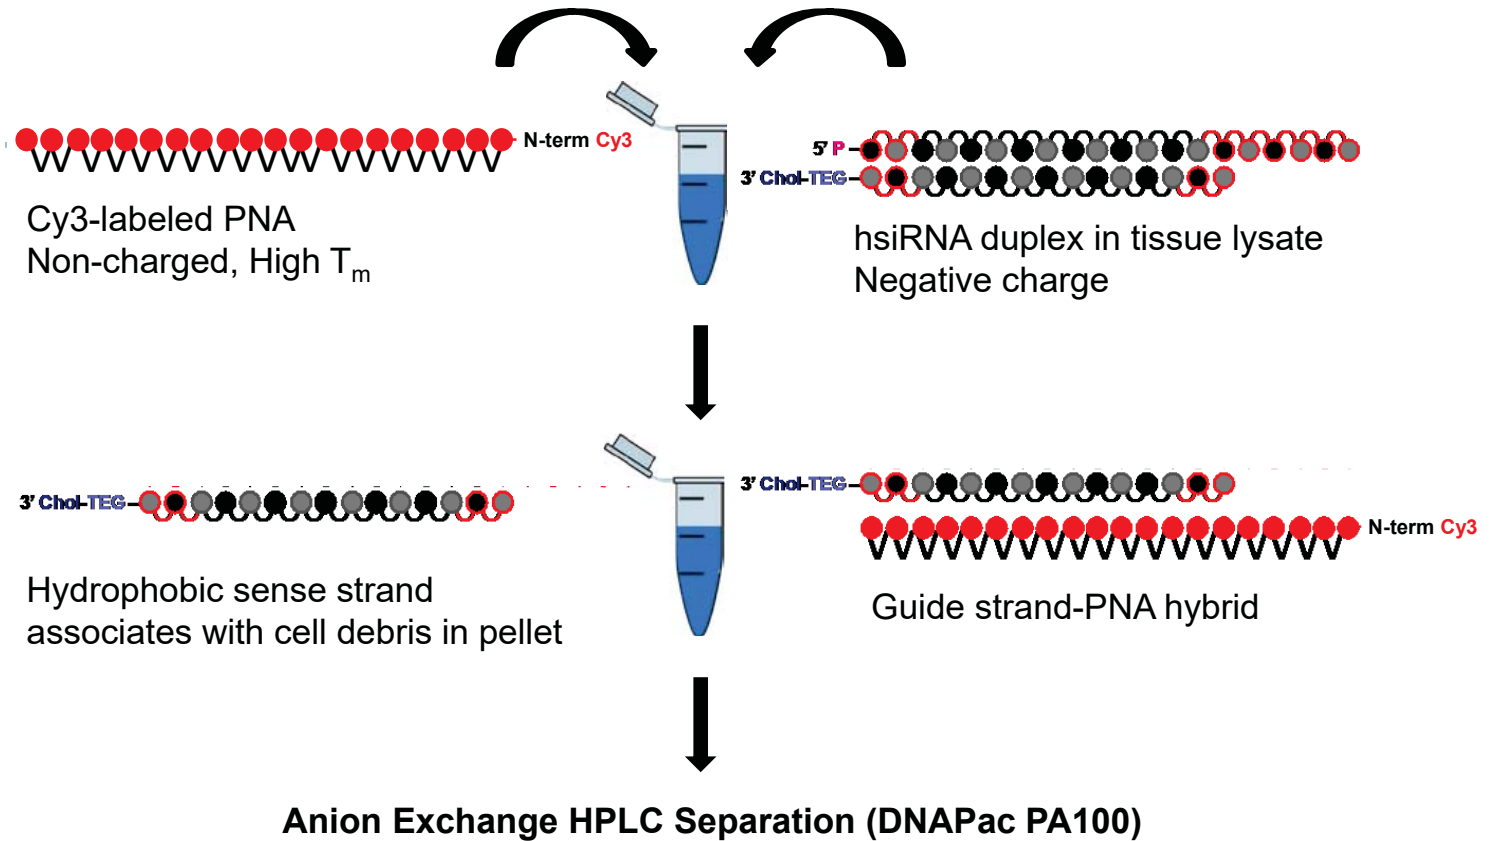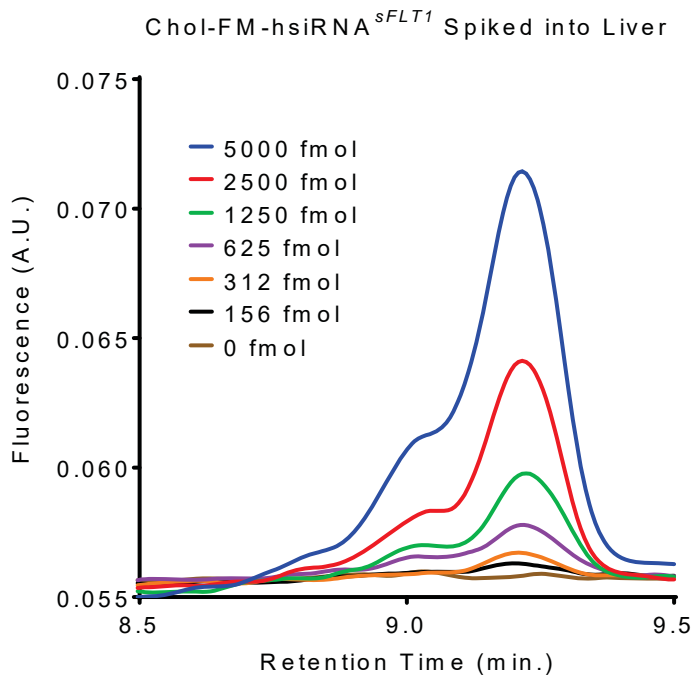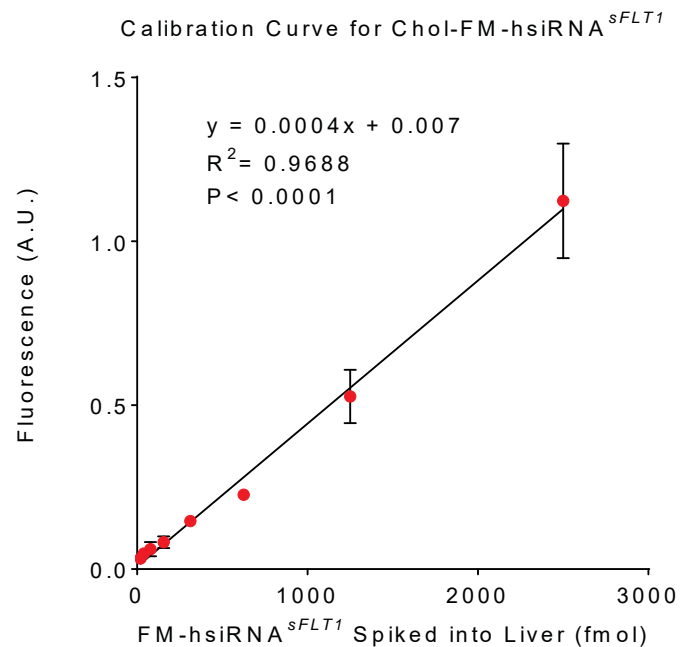

**Supplementary Figure 5 PNA (Peptide Nucleic Acid) hybridization-based assay for detection of hsiRNAs in mouse tissues.** A Cy3-labeled PNA fully complementary to the guide strand out-competes the passenger strand and/or any mRNA targets the guide strand might be bound to. Then, the guide strand – PNA hybrid is separated from other components of tissue lysates by anion exchange chromatography. A calibration curve was derived by spiking in known amount of hsiRNA into tissue lysates.

## Supplementary Table 1

**Table 1** Chemical modification patterns and sequences of hsiRNAs

| siRNA ID                                      | Gene  | Accession number | Targeting Position | Sense                                         | Antisense                                                    | Conjugate       |
|-----------------------------------------------|-------|------------------|--------------------|-----------------------------------------------|--------------------------------------------------------------|-----------------|
| Chol-hsiRNA <sup>HTT</sup>                    | HTT   | NM_002111.6      | 10150              | mC.mA.G.mU.A.A.A.mG.A.G.A.mU.mU#mA#mA         | PmU.fU.A.A.fU.fC.fU.fU.fU.A.fC.fU#G#A#fU#A#U#A               | Teg-cholesterol |
| Chol-FM.1-hsiRNA <sup>HTT</sup>               | HTT   | NM_002111.6      | 10150              | fC.mA.fG.mU.fA.mA.fA.mG.fA.mG.fA.mU.fU#mA#fA# | PmU.fU.mA.fA.mU.fC.mU.fC.mU.fU.mU.fA.mC.fU#mG#fA#mU#fA#mU#fA | Teg-cholesterol |
| Chol-Fluoro tail-hsiRNA <sup>HTT</sup>        | HTT   | NM_002111.6      | 10150              | fC.mA.fG.mU.fA.mA.fA.mG.fA.mG.fA.mU.fU#mA#fA# | PmU.fU.mA.fA.mU.fC.mU.fC.mU.fU.mU.fA.mC.fU#fG#fA#fU#fA#fU#fA | Teg-cholesterol |
| Chol-Fluoro AS-hsiRNA <sup>HTT</sup>          | HTT   | NM_002111.6      | 10150              | fC.mA.fG.mU.fA.mA.fA.mG.fA.mG.fA.mU.fU#mA#fA# | PmU.fU.fA.fA.fU.fC.fU.fC.fU.fU.fA.fC.fU#fG#fA#fU#fA#fU#fA    | Teg-cholesterol |
| Chol-FM.1-mismatch-hsiRNA <sup>HTT</sup>      | HTT   | NM_002111.6      | 10150              | fC.mA.fU.mU.fA.mA.fA.mG.fA.mG.fA.mU.fU#mA#fA# | PmU.fU.mA.fA.mU.fC.mU.fC.mU.fU.mU.fA.mC.fU#mG#fA#mU#fA#mU#fA | Teg-cholesterol |
| Chol-Fluoro AS-mismatch-hsiRNA <sup>HTT</sup> | HTT   | NM_002111.6      | 10150              | fC.mA.fU.mU.fA.mA.fA.mG.fA.mG.fA.mU.fU#mA#fA# | PmU.fU.fA.fA.fU.fC.fU.fC.fU.fU.fA.fC.fU#fG#fA#fU#fA#fU#fA    | Teg-cholesterol |
| Chol-FM-hsiRNA <sup>HTT</sup>                 | HTT   | NM_002111.6      | 10150              | fC#mA#fG.mU.fA.mA.fA.mG.fA.mG.fA.mU.fU#mA#fA  | PmU#fU#mA.fA.mU.fC.mU.fC.mU.fU.mU.fA.mC#fU#mG#fA#mU#fA#mU#fA | Teg-cholesterol |
| Chol-hsiRNA <sup>sFLT1</sup>                  | sFLT1 | NM_001159920     | 2283               | mG.mA.mU.mC.mU.mC.mC.A.A.A.mU.mU#mA#mA        | PmU.A.A.A.fU.fU.fU.G.G.mA.G.A.fU.fC#fC#G#A#G#A#G             | Teg-cholesterol |
| Chol-FM-hsiRNA <sup>sFLT1</sup>               | sFLT1 | NM_001159920     | 2283               | fG#mG#fA.mU.fC.mU.fC.mC.fA.mA.fA.mU.fU#mU#fA  | PmU#fA#mA.fA.mU.fU.mU.fG.mG.fA.mG.fA.mU#fC#mC#fG#mA#fG#mA#G  | Teg-cholesterol |

|                                             |       |                  |       |                                                  |                                                                  |                 |
|---------------------------------------------|-------|------------------|-------|--------------------------------------------------|------------------------------------------------------------------|-----------------|
| Chol-hsiRNA <sup>PPIB</sup>                 | PPIB  | NM_009693.2      | 437   | mC.mA.A.A.mU.mU.mC.mC.A.mU.mC<br>.G.mU#mG#mA#    | PmU.fC.A.fC.G.A.fU.G.G.mA.A.fU.fU#G#C#f<br>U#G#U#U               | Teg-cholesterol |
| Chol-FM-hsiRNA <sup>PPIB</sup>              | PPIB  | NM_009693.2      | 437   | fC#mA#fA.mA.fU.mU.fC.mC.fA.mU.fC.<br>mG.fU#mG#fA | PmU#fC#mA.fC.mG.fA.mU.fG.mG.fA.mA.fU.mU<br>#fU#mG#fC#mU#fG#mU#fU | Teg-cholesterol |
| GalNAc-hsiRNA <sup>HTT</sup>                | HTT   | NM_002111.6      | 10150 | mC.mA.G.mU.A.A.A.mG.A.G.A.mU.m<br>U#mA#mA        | PmU.fU.A.A.fU.fC.fU.fC.fU.fU.A.fC.fU#G#A#f<br>U#A#fU#A           | GalNAc          |
| GalNAc-FM-hsiRNA <sup>HTT</sup>             | HTT   | NM_002111.6      | 10150 | fC#mA#fG.mU.fA.mA.fA.mG.fA.mG.fA.<br>mU.fU#mA#fA | PmU#fU#mA.fA.mU.fC.mU.fC.mU.fU.mU.fA.mC<br>#fU#mG#fA#mU#fA#mU#fA | GalNAc          |
| siRNA <sup>HTT</sup>                        | HTT   | NM_002111.6      | 10150 | mA.mU.A.U.C.A.G.U.A.A.A.G.A.G.A.U.<br>U.A.A.U.U  | PU.U.A.A.U.C.U.C.U.U.U.A.C.U.G.A.U.A.U.U.U                       | none            |
| DHA-hsiRNA <sup>sFLT1</sup>                 | sFLT1 | NM_0011599<br>20 | 2283  | mG.mA.mU.mC.mU.mC.mC.A.A.A.mU<br>.mU.mU#mA#mA    | PmU.A.A.A.fU.fU.fU.G.G.mA.G.A.fU.fC#fC#G#A<br>#G#A#G             | DHA             |
| DHA-FM-hsiRNA <sup>sFLT1</sup>              | sFLT1 | NM_0011599<br>20 | 2283  | fG#mG#fA.mU.fC.mU.fC.mC.fA.mA.fA<br>.mU.fU#mU#fA | PmU#fA#mA.fA.mU.fU.mU.fG.mG.fA.mG.fA.mU.<br>fC#mC#fG#mA#fG#mA#fG | DHA             |
| DHA-FM-hsiRNA <sup>PPIB</sup>               | PPIB  | NM_009693.2      | 437   | fC#mA#fA.mA.fU.mU.fC.mC.fA.mU.fC.<br>mG.fU#mG#fA | PmU#fC#mA.fC.mG.fA.mU.fG.mG.fA.mA.fU.mU<br>#fU#mG#fC#mU#fG#mU#fU | DHA             |
| <sup>V</sup> Chol-hsiRNA <sup>PPIB</sup>    | PPIB  | NM_009693.2      | 437   | mC.mA.A.A.mU.mU.mC.mC.A.mU.mC<br>.G.mU#mG#mA#    | VmU.fC.A.fC.G.A.fU.G.G.mA.A.fU.fU#G#C#f<br>U#G#U#U               | Teg-cholesterol |
| <sup>V</sup> Chol-FM-hsiRNA <sup>PPIB</sup> | PPIB  | NM_009693.2      | 437   | fC#mA#fA.mA.fU.mU.fC.mC.fA.mU.fC.<br>mG.fU#mG#fA | VmU#fC#mA.fC.mG.fA.mU.fG.mG.fA.mA.fU.mU<br>#fU#mG#fC#mU#fG#mU#fU | Teg-cholesterol |
| <sup>V</sup> Chol-hsiRNA <sup>HTT</sup>     | HTT   | NM_002111.6      | 10150 | mC.mA.G.mU.A.A.A.mG.A.G.A.mU.m<br>U#mA#mA        | VmU.fU.A.A.fU.fC.fU.fC.fU.fU.A.fC.fU#G#A#f<br>U#A#fU#A           | Teg-cholesterol |



|                                              |       |                  |       |                                                  |                                                                  |                 |
|----------------------------------------------|-------|------------------|-------|--------------------------------------------------|------------------------------------------------------------------|-----------------|
| <sup>V</sup> Chol-FM-hsiRNA <sup>HTT</sup>   | HTT   | NM_002111.6      | 10150 | fC#mA#fG.mU.fA.mA.fA.mG.fA.mG.fA.<br>mU.fU#mA#fA | VmU#fU#mA.fA.mU.fC.mU.fC.mU.fU.mU.fA.mC<br>#fU#mG#fA#mU#fA#mU#fA | Teg-cholesterol |
| <sup>V</sup> Chol-hsiRNA <sup>sFLT1</sup>    | sFLT1 | NM_0011599<br>20 | 2283  | mG.mA.mU.mC.mU.mC.mC.A.A.A.mU<br>.mU.mU#mA#mA    | VmU.A.A.A.fU.fU.fU.G.G.mA.G.A.fU.fC#fC#G#A<br>#G#A#G             | Teg-cholesterol |
| <sup>V</sup> Chol-FM-hsiRNA <sup>sFLT1</sup> | sFLT1 | NM_0011599<br>20 | 2283  | fG#mG#fA.mU.fC.mU.fC.mC.fA.mA.fA<br>.mU.fU#mU#fA | VmU#fA#mA.fA.mU.fU.mU.fG.mG.fA.mG.fA.mU<br>#fC#mC#fG#mA#fG#mA#G  | Teg-cholesterol |
| PNA <sup>sFLT1</sup>                         | sFLT1 | NM_0011599<br>20 | 2283  | C*T*C*T*C*G*G*A*T*C*T*C*C*A*A*A*<br>T*T*T*A      |                                                                  | CY3 -(OO)-      |

---

Chemical modifications are designated as follows. "." – phosphodiester bond, "#" – phosphorothioate bond, "m" – 2'-O-Methyl, "f" – 2'-Fluoro, no prefix – ribonucleotide, "P" – 5' Phosphate, "V" – 5'-(E)-Vinyl phosphonate, "teg-cholesterol" – tetraethylene glycol (teg)-Cholesterol, GalNAc – trivalent N-Acetylgalactosamine, (OO) – O-linker (PNA Bio), DHA – docosahexaenoic acid.

---
